# Supplementary material
Source: MDPI journal article supplement (https://www.mdpi.com/2306-5710/4/4/103)
Supplement: s1 [file s1]

**Supplementary Table 1.** Classical analysis of the base wines used in the elaboration of the sparkling wines produced by the traditional method in the SFV.

| Assessments*                               | Base wines   |              |              |              |
|--------------------------------------------|--------------|--------------|--------------|--------------|
|                                            | CB           | SY           | CB+SY-W      | CB+SY-R      |
| <b>Density</b>                             | 0.993 ± 0.01 | 0.994 ± 0.00 | 0.994 ± 0.00 | 0.994 ± 0.01 |
| <b>Residual sugar (g L<sup>-1</sup>)</b>   | 2.96 ± 0.08  | 3.24 ± 0.04  | 3.02 ± 0.05  | 3.18 ± 0.15  |
| <b>Alcohol content<br/>(%v/v)</b>          | 11.48 ± 0.30 | 11.60 ± 0.01 | 11.72 ± 0.04 | 11.44 ± 0.02 |
| <b>Dry extract (g L<sup>-1</sup>)</b>      | 21.75 ± 0.25 | 22.85 ± 0.05 | 24.30 ± 0.10 | 24.10 ± 0.25 |
| <b>pH</b>                                  | 3.30 ± 0.01  | 3.42 ± 0.04  | 3.43 ± 0.02  | 3.55 ± 0.04  |
| <b>Total acidity (g L<sup>-1</sup>)</b>    | 10.10 ± 0.02 | 8.35 ± 0.15  | 8.45 ± 0.01  | 8.35 ± 0.02  |
| <b>Volatile acidity (g L<sup>-1</sup>)</b> | 0.40 ± 0.03  | 0.38 ± 0.01  | 0.40 ± 0.01  | 0.40 ± 0.03  |

\*The results are expressed as mean ± standard deviation of three base wine bottles (triplicate). CB: base wine 100% Chenin Blanc; SY: base wine 100% Syrah; CB+SY-W: base wine 50% Chenin Blanc + 50% Syrah, elaborated as white; and CB+SY-R: base wine 50% Chenin Blanc + 50% Syrah, elaborated as rosé.
